# Supplementary material for: Organic cation transporter 1 (OCT1) modulates multiple cardiometabolic traits through effects on hepatic thiamine content
Source: PLoS Biol. 2018 Apr 16;16(4):e2002907. doi: 10.1371/journal.pbio.2002907 (PMC5919692; doi:10.1371/journal.pbio.2002907)
Supplement: S4 Table — G401S, Glycine to serine in amino acid position 401; G465R, Glycine to arginine in amino acid position 465; R61C, Arginine to cysteine in amino acid position 61; SLC, solute carrier; V408M, Valine to methionine in amino acid position 408. (XLSX) [file pbio.2002907.s010.xlsx]

## Sheet: Sheet1
S4 Table: Associations of SLC22A1 reduced function non-synonymous variants (R61C, G401S, V408M, G465R) with thiamine levels in human. Data obtained through communication with Dr. E.P. Rhee, who have published the study in Nature Communication, 2016 Jul 25; 7:12360. The positive beta coefficient means that the minor allele is associated with higher thiamine level. n0, n1 and n2 means the number of…
snp	dbSNPID	single_gene	Amino Acid Change	n0	n1	n2	h2q	beta	se	pval	marker	major	minor	maf
chr6:160560845	rs628031	SLC22A1	V408M (G>A)	690	783	252	0.00323775	0.0837347	0.0350499	0.0168938	exm592590	G	A	0.379109
chr6:160551204	rs683369	SLC22A1	F160L	1130	520	75	0.00188994	0.0736361	0.0426714	0.0844093	exm592540	C	G	0.201178
chr6:160560824	rs34130495	SLC22A1	G401S (G>A)	1638	87	0	0.000892425	0.131987	0.111053	0.234633	exm592588	G	A	0.0241016
chr6:160543229	rs55918055	SLC22A1	C88R	1706	19	0	0.000824389	0.243032	0.233081	0.29709	exm592522	T	C	0.00478352
chr6:160543148	rs12208357	SLC22A1	R61C (C>T)	1512	207	6	0.000547871	0.0702076	0.0710826	0.323304	exm592509	C	T	0.0676438
chr6:160575837	rs34059508	SLC22A1	G465R (G>A)	1638	85	2	2.16619e-05	0.0197243	0.107459	0.854364	exm592613	G	A	0.0264933
